# Supplementary material
Source: PubMed Central journal article supplement (PMC9620729)
Supplement: hcac234_supplementary_data.pdf [file hcac234_supplementary_data.pdf]

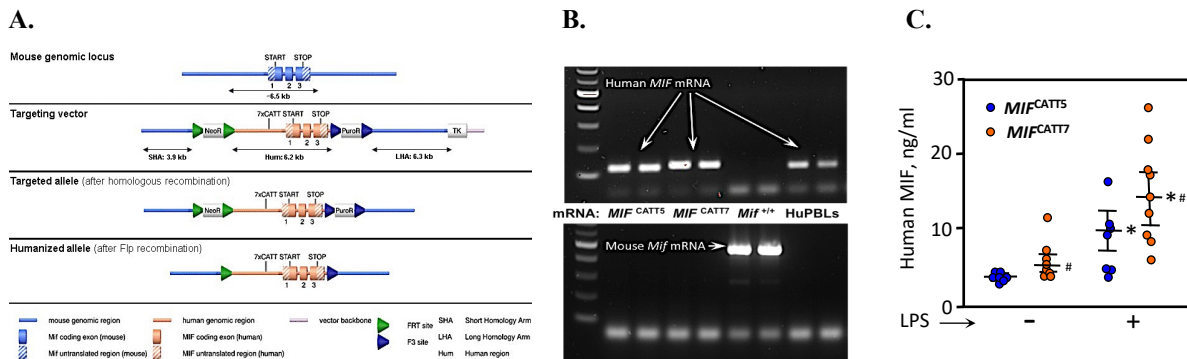

**Supplementary Figure 1. A.** Scheme employed for the creation of humanized *MIF* mice by vector-based recombinant replacement of the endogenous *Mif* gene with a human high-expresser -794 CATT<sub>7</sub> (7xCATT=CATT<sub>7</sub>, shown) or low-expresser -794 CATT<sub>5</sub> *MIF* allele, yielding the *MIF*<sup>CATT7</sup> and *MIF*<sup>CATT5</sup> C57BL/6J strains. **B.** Validation of human MIF mRNA expression by PCR of splenic leukocytes from *MIF*<sup>CATT5</sup> and *MIF*<sup>CATT7</sup> strains but not C57BL/6 wild-type (*Mif*<sup>+/+</sup>) mice (n=2 mice per group). HuPBLs: human peripheral blood leukocytes. **C.** Plasma human MIF levels before (-) and 5 hrs after (+) intraperitoneal injection of the model stimulus lipopolysaccharide (LPS, 2.5 mg/kg) in *MIF*<sup>CATT5</sup> and *MIF*<sup>CATT7</sup> mice (n=6-9 per group). Mean ± SD, \**p*<0.01 for +LPS vs -LPS, #*p*<0.05 for *MIF*<sup>CATT5</sup> versus *MIF*<sup>CATT7</sup> mouse strains.

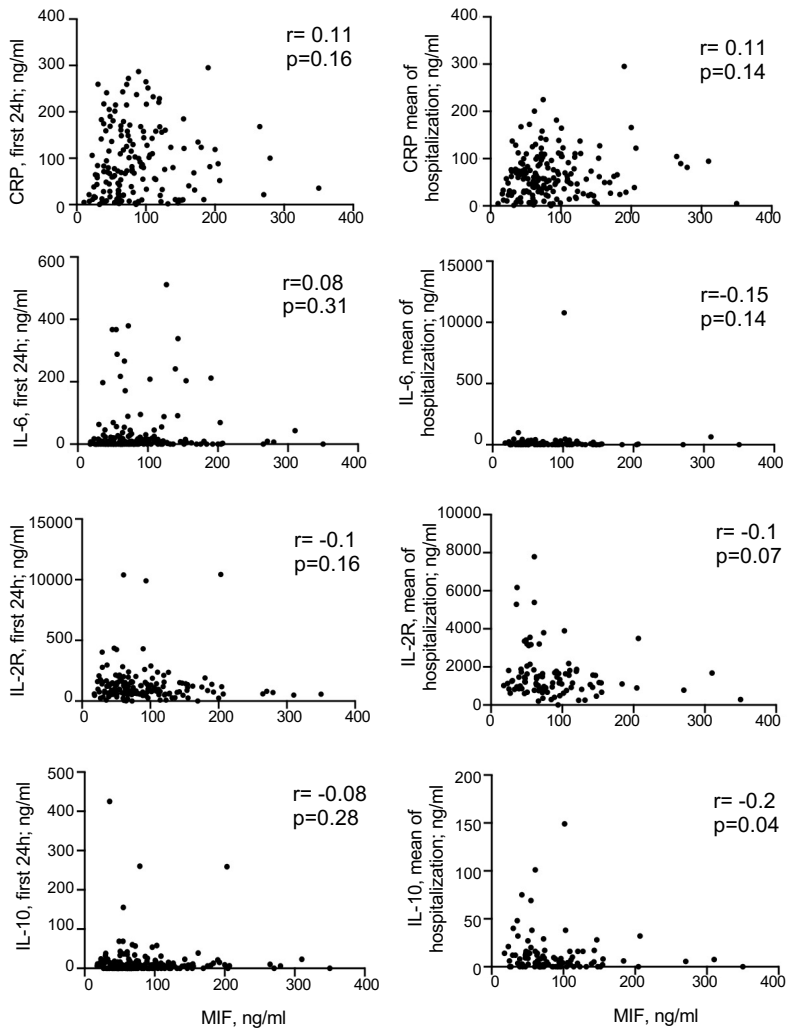

**Supplementary Figure 2.** Correlations between serum MIF and CRP, IL-6, IL-2R and IL-10 levels in 163 COVID-19 patients measured in the first 24 hrs of hospital admission and as a mean of hospitalization duration.

**A.**

|                                | <b>Healthy Controls</b> | <b>US Patients</b> | <b>Hungary Patients</b> | <b>Spain Patients</b> | <b>All Patients</b> |
|--------------------------------|-------------------------|--------------------|-------------------------|-----------------------|---------------------|
| Total                          | 617                     | 284                | 128                     | 580                   | 992                 |
| <b>-794 CATT<sub>5,6</sub></b> | 501 (81%)               | 250 (88%)          | 114 (90%)               | 517 (89%)             | 881 (89%)           |
| <b>-794 CATT<sub>7,8</sub></b> | 116 (19%)               | 34 (12%)           | 14 (10%)                | 63 (11%)              | 111 (11%)           |
| Odds ratio                     |                         | 0.59               | 0.53                    | 0.53                  | 0.54                |
| 95% CI                         |                         | 0.39, 0.88         | 0.28, 0.94              | 0.38, 0.73            | 0.41, 0.72          |
| <i>p</i> value                 |                         | 0.01               | 0.04                    | 0.0001                | <0.0001             |

**B.**

|                | <b>Healthy Controls</b> | <b>US Patients</b> | <b>Hungary Patients</b> | <b>Spain Patients</b> | <b>All Patients</b> |
|----------------|-------------------------|--------------------|-------------------------|-----------------------|---------------------|
| Total          | 579                     | 191                | 220                     | 367                   | 778                 |
| <b>-173 G</b>  | 548 (95%)               | 181 (95%)          | 213 (97%)               | 350 (96%)             | 744 (96%)           |
| <b>-173 C</b>  | 31 (5%)                 | 10 (5%)            | 7 (3%)                  | 17 (4%)               | 34 (4%)             |
| Odds ratio     |                         | 0.97               | 0.61                    | 0.86                  | 0.81                |
| 95% CI         |                         | 0.47, 2.01         | 0.27, 1.34              | 0.48, 1.54            | 0.49, 1.33          |
| <i>p</i> value |                         | 0.99               | 0.26                    | 0.65                  | 0.44                |

**Supplementary Table 1.** Frequencies of the *MIF* -794 CATT<sub>5-8</sub> (A) and -173 G/C alleles (B) in healthy controls and COVID-19 patients by study sites and in all patients. The -794 CATT<sub>5-8</sub> alleles are grouped into low-expresser (CATT<sub>5,6</sub>) and high-expresser (CATT<sub>7,8</sub>) variants.

**A.**

|                                | US Patients |            | Hungary Patients |            | Spain Patients |            | All Patients |            |
|--------------------------------|-------------|------------|------------------|------------|----------------|------------|--------------|------------|
| Total                          | 284         |            | 128              |            | 580            |            | 992          |            |
| Total                          | Inpatient   | Outpatient | Inpatient        | Outpatient | Inpatient      | Outpatient | Inpatient    | Outpatient |
|                                | 177         | 107        | 108              | 20         | 520            | 60         | 805          | 187        |
| <b>-794 CATT<sub>5,6</sub></b> | 147 (83%)   | 103 (96%)  | 95 (89%)         | 19 (95%)   | 461 (89%)      | 56 (93%)   | 703 (87%)    | 178 (95%)  |
| <b>-794 CATT<sub>7,8</sub></b> | 30 (17%)    | 4 (4%)     | 13 (11%)         | 1 (5%)     | 59 (11%)       | 4 (7%)     | 102 (13%)    | 9 (5%)     |
| <b><i>p</i></b>                | 0.0009      |            | 0.4              |            | 0.02           |            | 0.002        |            |

**B.**

|                 | US Patients |            | Hungary Patients |            | Spain Patients |            | All Patients |            |
|-----------------|-------------|------------|------------------|------------|----------------|------------|--------------|------------|
| Total           | 191         |            | 220              |            | 367            |            | 778          |            |
| Total           | Inpatient   | Outpatient | Inpatient        | Outpatient | Inpatient      | Outpatient | Inpatient    | Outpatient |
|                 | 124         | 67         | 210              | 10         | 330            | 37         | 664          | 114        |
| <b>-173 G</b>   | 115 (93%)   | 66 (98%)   | 204 (97%)        | 9 (90%)    | 315 (95%)      | 35 (95%)   | 634 (96%)    | 110 (96%)  |
| <b>-173 C</b>   | 9 (7%)      | 1 (2%)     | 6 (3%)           | 1 (10%)    | 15 (5%)        | 2 (5%)     | 30 (4%)      | 4 (4%)     |
| <b><i>p</i></b> | 0.12        |            | 0.24             |            | 0.81           |            | 0.63         |            |

**Supplementary Table 2.** Frequencies of the *MIF* -794 CATT<sub>5-8</sub> (A) and -173 G/C alleles (B) in inpatients and outpatients with COVID-19 in the three studied sites and in all patients. The -794 CATT<sub>5-8</sub> alleles are grouped into low-expresser (CATT<sub>5,6</sub>) and high-expresser (CATT<sub>7,8</sub>) variants.

| Elixhauser comorbidities<br>US Patients            | -794 CATT <sub>5,6</sub><br>n=137 | -794 CATT <sub>7,8</sub><br>n=26 | <i>p</i> |
|----------------------------------------------------|-----------------------------------|----------------------------------|----------|
| HTN uncomplicated                                  | 75%                               | 76%                              | 0.79     |
| HTN complicated                                    | 32%                               | 26%                              | 0.61     |
| DM uncomplicated                                   | 43%                               | 42%                              | 0.94     |
| DM complicated                                     | 35%                               | 53%                              | 0.09     |
| Congestive heart failure                           | 24%                               | 19%                              | 0.59     |
| Cardiac arrhythmias                                | 42%                               | 39%                              | 0.77     |
| Valvular disease                                   | 28%                               | 27%                              | 0.93     |
| Peripheral vascular disease                        | 21%                               | 27%                              | 0.52     |
| Chronic pulmonary disease                          | 26%                               | 31%                              | 0.58     |
| Pulmonary circulatory disorders                    | 15%                               | 23%                              | 0.28     |
| Coagulopathy                                       | 18%                               | 23%                              | 0.56     |
| Deficiency anemia                                  | 19%                               | 19%                              | 0.97     |
| Blood loss anemia                                  | 6%                                | 8%                               | 0.72     |
| Peptic ulcer disease                               | 5%                                | 4%                               | 0.79     |
| Liver disease                                      | 16%                               | 27%                              | 0.18     |
| Electrolyte disorder                               | 46%                               | 46%                              | 0.99     |
| Renal failure                                      | 26%                               | 15%                              | 0.27     |
| hypothyroidism                                     | 17%                               | 19%                              | 0.76     |
| Obesity                                            | 36%                               | 27%                              | 0.38     |
| Weight loss                                        | 27%                               | 23%                              | 0.67     |
| Solid tumor                                        | 24%                               | 19%                              | 0.59     |
| Lymphoma                                           | 3%                                | 0%                               | 0.38     |
| Metastatic cancer                                  | 23%                               | 12%                              | 0.15     |
| Psychoses                                          | 9%                                | 8%                               | 0.86     |
| Depression                                         | 32%                               | 34%                              | 0.81     |
| Paralysis                                          | 5%                                | 4%                               | 0.79     |
| Rheumatoid arthritis/ collagen<br>vascular disease | 10%                               | 10%                              | 0.15     |
| HIV/ AIDS                                          | 2%                                | 4%                               | 0.41     |
| Drug abuse                                         | 12%                               | 15%                              | 0.59     |
| Alcohol abuse                                      | 7%                                | 15%                              | 0.17     |

**Supplementary Table 3.** Frequencies of Elixhauser comorbidities between patients with *MIF* -794 CATT<sub>5,6</sub> and *MIF* -794 CATT<sub>5,6</sub> alleles in the US cohort.

| <b>Comorbidities<br/>Hungary Patients</b> | <b>-794 CATT<sub>5,6</sub><br/>n=108</b> | <b>-794 CATT<sub>7,8</sub><br/>n=20</b> | <b><i>p</i></b> |
|-------------------------------------------|------------------------------------------|-----------------------------------------|-----------------|
| Chronic obstructive Respiratory disease   | 10%                                      | 5%                                      | 0.32            |
| Respiratory Disorders                     | 38%                                      | 44%                                     | 0.34            |
| Cardiovascular Disorders                  | 39%                                      | 42%                                     | 0.44            |

**Supplementary Table 4.** Frequencies of comorbidities between patients with *MIF* -794 CATT<sub>5-6</sub> and *MIF* -794 CATT<sub>5-6</sub> alleles in the Hungary cohort.
